# Supplementary material
Source: Springer Nature journal article supplement (https://www.springermedizin.de/resource/supplementary/12875_2011_562_MOESM4_ESM.pdf/9434946)

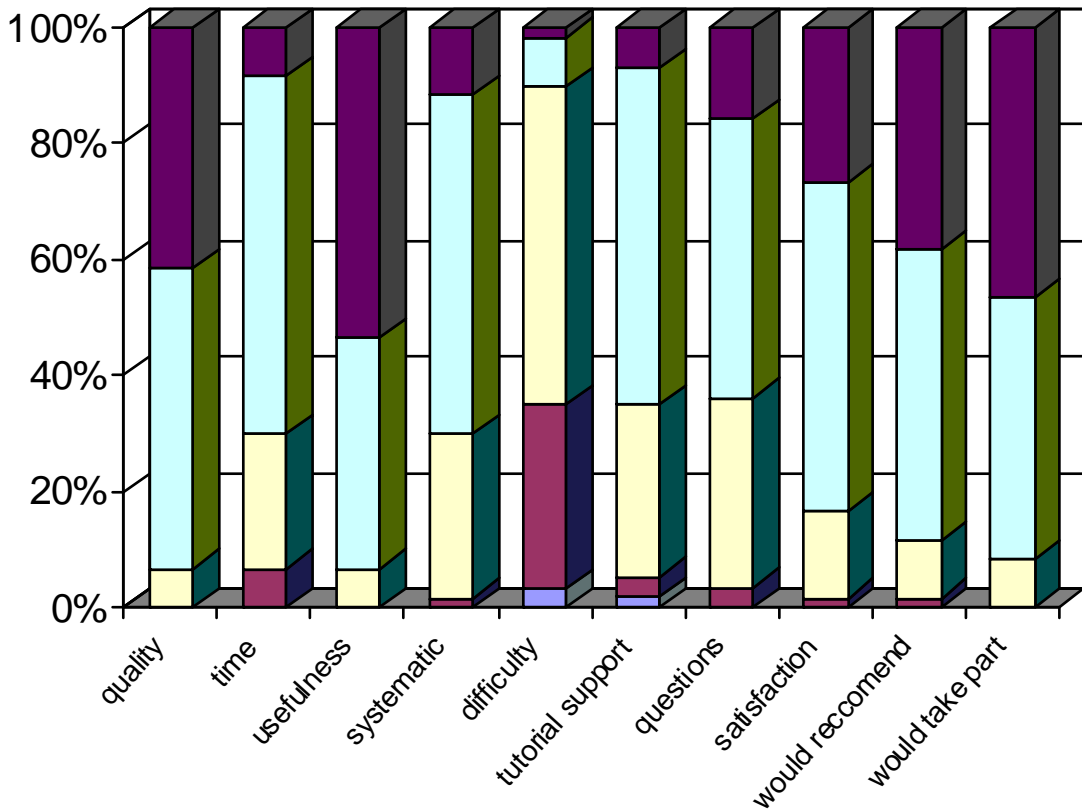

■ very poor 
 ■ poor 
 ■ acceptable 
 ■ good 
 ■ very good

Supplement: MOESM4 [file 9434946]
